# Supplementary material for: Antioxidant Molecular Brain Changes Parallel Adaptive Cardiovascular Response to Forced Running in Mice
Source: MDPI journal article supplement (doi:10.3390/antiox11101891), 2022-09-23
Supplement: s1 [file s1]

# Antioxidant Molecular Brain Changes Parallel Adaptive Cardiovascular Response to Forced Running in Mice

Clara Bartra, Lars Andre Jager, Anna Alcarraz, Aline Meza-Ramos, Gemma Sangüesa, Rubén Corpas, Eduard Guasch, Montserrat Batlle and Coral Sanfeliu.

**Table S1.** List of TaqMan® Gene Expression Assays used for real time qPCR analysis

| Gene Symbol   | Assay ID      | Gene Name                                        |
|---------------|---------------|--------------------------------------------------|
| <i>Actb</i>   | Mm02619580_g1 | <i>Actin, beta</i>                               |
| <i>Bdnf</i>   | Mm04230607_s1 | <i>Brain Derived Neurotrophic Factor</i>         |
| <i>Cat</i>    | Mm00437992_m1 | <i>Catalase</i>                                  |
| <i>Creb1</i>  | Mm00501607_m1 | <i>CAMP Responsive Element Binding Protein 1</i> |
| <i>Gdnf</i>   | Mm00599849_m1 | <i>Glial Cell Derived Neurotrophic Factor</i>    |
| <i>Nfe2l2</i> | Mm00477784_m1 | <i>NFE2 Like BZIP Transcription Factor 2</i>     |
| <i>Psmb5</i>  | Mm07296970_g1 | <i>Proteasome 20S Subunit Beta 5</i>             |
| <i>Psmb6</i>  | Mm01245590_g1 | <i>Proteasome 20S Subunit Beta 6</i>             |
| <i>Psmb7</i>  | Mm01327044_m1 | <i>Proteasome 20S Subunit Beta 7</i>             |
| <i>Psmb8</i>  | Mm01278980_g1 | <i>Proteasome 20S Subunit Beta 8</i>             |
| <i>PsmB9</i>  | Mm00479004_m1 | <i>Proteasome 20S Subunit Beta 9</i>             |
| <i>Psmb10</i> | Mm00479052_g1 | <i>Proteasome 20S Subunit Beta 10</i>            |
| <i>Sirt1</i>  | Mm00490758_m1 | <i>Sirtuin 1</i>                                 |
| <i>Sod2</i>   | Mm01313000_m1 | <i>Superoxide Dismutase 2</i>                    |
| <i>Ubc</i>    | Mm01198158_m1 | <i>Ubiquitin C</i>                               |
| <i>Vegfa</i>  | Mm01281449_m1 | <i>Vascular Endothelial Growth Factor</i>        |

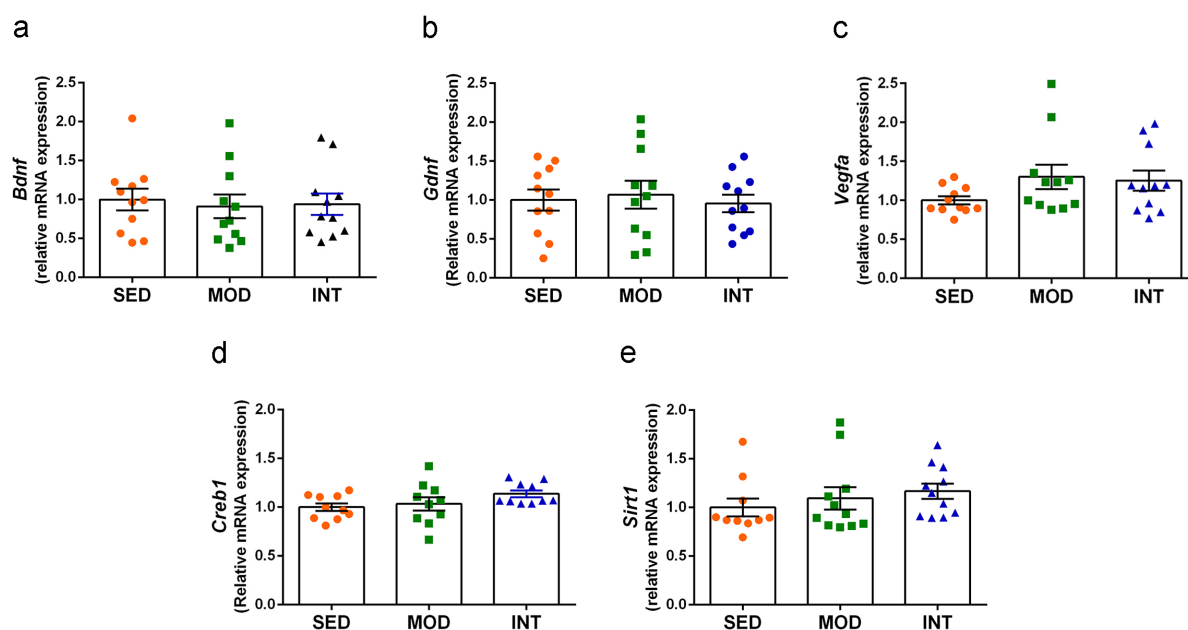

**Figure S1.** Gene expression of neuroplasticity markers was not significantly increased by exercise training regimens. Genes for neurotrophic factors BDNF (a), GDNF (b) and VEGF (c); and for the signal transducers CREB1 (d) and SIRT1 (e). Experimental groups: SED (orange circles), sedentary;

MOD (green squares), moderate training; INT (blue triangles), high-intensity training. Values are mean  $\pm$  SEM ((a-c) SED  $n = 11$ , MOD  $n = 11$ , INT  $n = 11$ ); (d) SED  $n = 10$ , MOD  $n = 10$ , INT  $n = 10$ ; (e) SED  $n = 10$ , MOD  $n = 11$ , INT  $n = 11$ ).

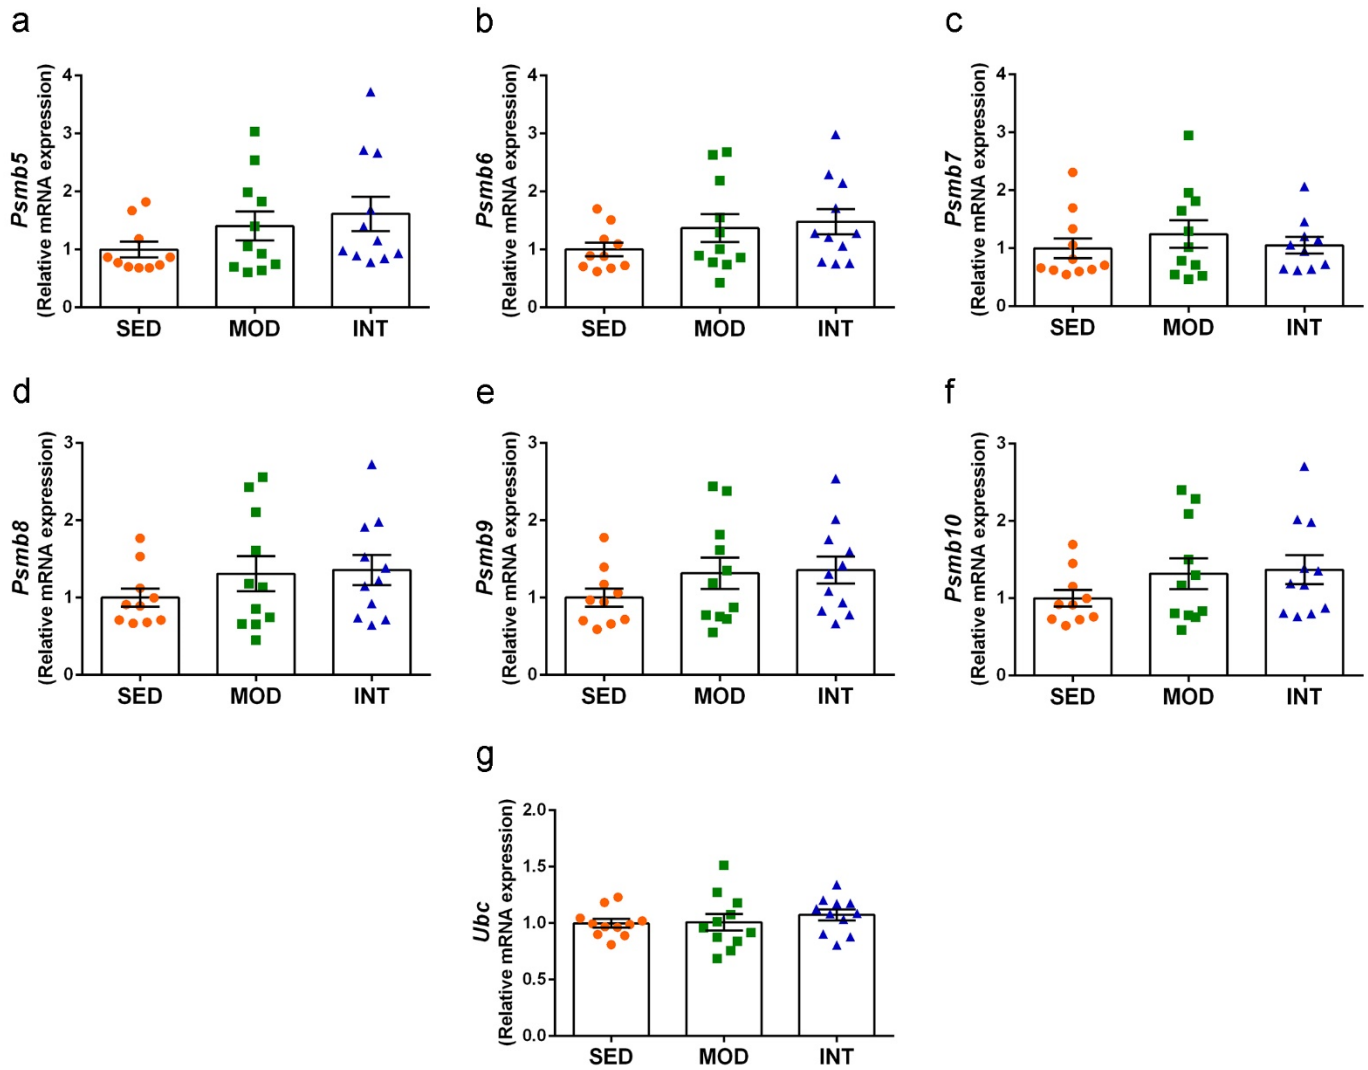

**Figure S2.** Gene expression of the catalytic 20S constitutive proteasome and 20S immunoproteasome was not significantly increased by exercise training regimens. Genes: *Psmb5* codifies for subunit  $\beta 5$  with chymotrypsin-like activity (a); *Psmb6* codifies for subunit  $\beta 1$  with caspase-like activity (b); *Psmb7* codifies for subunit  $\beta 2$  with trypsin-like activity (c); *Psmb8* codifies for subunit  $\beta 5i$  with chymotrypsin-like activity (d); *Psmb9* codifies for subunit  $\beta 1i$  with caspase-like activity (e); *Psmb10* codifies for subunit  $\beta 2i$  with trypsin-like activity (f); *Ubc* codifies for ubiquitin (g). Experimental groups: SED (orange circles), sedentary; MOD (green squares), moderate training; INT (blue triangles), high-intensity training. Values are mean  $\pm$  SEM ((a,b,d-f) SED  $n = 10$ , MOD  $n = 11$ , INT  $n = 11$ ); (c) SED  $n = 11$ , MOD  $n = 11$ , INT  $n = 10$ ; (g) SED  $n = 11$ , MOD  $n = 11$ , INT  $n = 11$ ).
